# Supplementary material for: Effects of Paper Mulberry Silage on the Milk Production, Apparent Digestibility, Antioxidant Capacity, and Fecal Bacteria Composition in Holstein Dairy Cows
Source: PubMed Central journal article supplement (PMC7401539; doi:10.3390/ani10071152), 2020-07-07
Supplement: animals-10-01152-s001.pdf [file animals-10-01152-s001.pdf]

**Table S1.** The chemical composition of paper mulberry silage

| Item <sup>1</sup> | DM, as-fed basis | NDF  | ADF  | CP   |
|-------------------|------------------|------|------|------|
| Content, %        | 20.4             | 43.1 | 33.5 | 16.9 |

<sup>1</sup> DM: dry matter, NDF: neutral detergent fiber, ADF: acid detergent fiber, CP: crude protein.

**Table S2.** Effects of paper mulberry silage on apparent total tract digestibility of dairy cow.

| Item <sup>1</sup> | Period | Treatment <sup>2</sup> |      |      | SEM | <i>p</i> -value |
|-------------------|--------|------------------------|------|------|-----|-----------------|
|                   |        | CON                    | PM1  | PM2  |     |                 |
| DM, %             | I      | 70.9                   | 70.1 | 69.3 | 2.7 | 0.97            |
|                   | II     | 72.1                   | 72.1 | 71.1 | 1.5 | 0.94            |
| NDF, %            | I      | 68.9                   | 69.0 | 69.0 | 1.2 | 0.53            |
|                   | II     | 61.4                   | 59.5 | 57.8 | 1.1 | 0.19            |
| ADF, %            | I      | 53.5                   | 50.4 | 51.3 | 1.1 | 0.77            |
|                   | II     | 50.3                   | 50.4 | 50.3 | 1.7 | 0.77            |
| CP, %             | I      | 73.6                   | 74.4 | 72.6 | 1.5 | 0.39            |
|                   | II     | 72.0                   | 71.7 | 71.1 | 1.8 | 0.19            |

<sup>1</sup> DM: dry matter, NDF: neutral detergent fiber, ADF: acid detergent fiber, CP: crude protein.

<sup>2</sup> CON: the control group fed none paper mulberry silage diet; PM1 and PM2: the treatment groups fed 4.5 and 9.0% paper mulberry silage supplementary diet during the period I. Then, treatment groups fed 13.5 and 18.0% paper mulberry silage during the second period, respectively. Period I, the first 28 days; Period II, the second 28 days.

**Table S3.** Effects of paper mulberry silage on the feces microbial OUT, richness and diversity of cows

| Items             | Period | Treatment |        |        | SEM  | <i>p</i> -values |
|-------------------|--------|-----------|--------|--------|------|------------------|
|                   |        | CON       | PM1    | PM2    |      |                  |
| OTU number        | I      | 1979.8    | 2023.2 | 1958.8 | 15.7 | 0.60             |
|                   | II     | 2111.0    | 2093.8 | 1981.2 | 33.1 | 0.35             |
| Richness estimate |        |           |        |        |      |                  |
| Chao1             | I      | 2477.7    | 2609.9 | 2638.8 | 40.4 | 0.12             |
|                   | II     | 2678.3    | 2708.2 | 2582.7 | 30.9 | 0.52             |
| Ace               | I      | 2422.2    | 2555.4 | 2584.5 | 40.8 | 0.11             |
|                   | II     | 2624.2    | 2651.6 | 2554.0 | 23.6 | 0.60             |
| Diversity indices |        |           |        |        |      |                  |
| Shannon           | I      | 8.1       | 8.2    | 7.8    | 0.1  | 0.07             |
|                   | II     | 8.2       | 8.0    | 7.9    | 0.1  | 0.34             |
| Simpson           | I      | 1.0       | 1.0    | 1.0    | <0.1 | 0.11             |
|                   | II     | 1.0       | 1.0    | 1.0    | <0.1 | 0.42             |

CON: the control group fed none paper mulberry silage diet; PM1 and PM2: the treatment groups fed 4.5 and 9.0% paper mulberry silage supplementary diet during the period I. Then, treatment groups fed 13.5 and 18.0% paper mulberry silage during the second period, respectively. Period I, the first 28 days; Period II, the second 28 days.

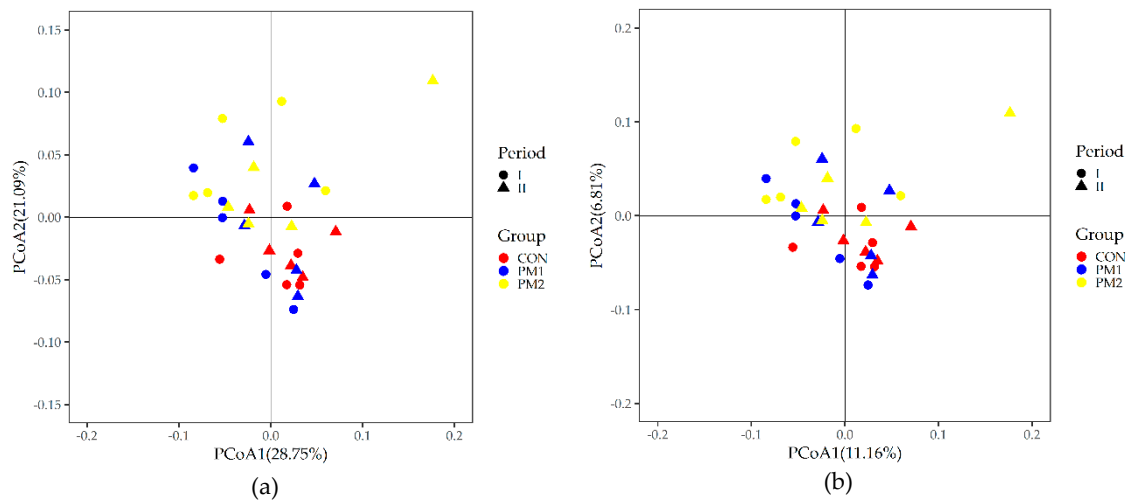

**Fig. S1.** Weighted (a) and unweighted (b) principal coordinate analysis (PCoA) illustrating relationships among fecal bacterial populations in cows fed different diets

CON: the control group fed none paper mulberry silage diet; PM1 and PM2: the treatment groups fed 4.5 and 9.0% paper mulberry silage supplementary diet during the period I. Then, treatment groups fed 13.5 and 18.0% paper mulberry silage during the second period, respectively. Period I, the first 28 days; Period II, the second 28 days.

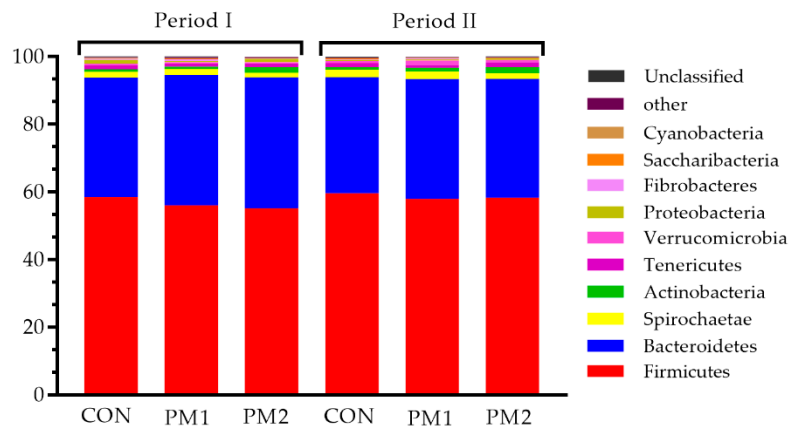

**Fig. S2.** Fecal bacteria composition at phylum level of dairy cows with different diets

CON: the control group fed none paper mulberry silage diet; PM1 and PM2: the treatment groups fed 4.5 and 9.0% paper mulberry silage supplementary diet during the period I. Then, treatment groups fed 13.5 and 18.0% paper mulberry silage during the second period, respectively. Period I, the first 28 days; Period II, the second 28 days.
